# Supplementary material for: Higher glucose, insulin and insulin resistance (HOMA-IR) in childhood predict adverse cardiovascular risk in early adulthood: the Pune Children’s Study
Source: PubMed Central journal article supplement (PMC4472941; doi:10.1007/s00125-015-3602-z), 2015-05-05
Supplement: 125_2015_3602_MOESM1_ESM.pdf [file 125_2015_3602_MOESM1_ESM.pdf]

ESM Table 1: Relationship of 21-year fasting glucose, fasting insulin and HOMA-IR with 21-year CVD risk factors

|                          | Fasting glucose     | Fasting insulin      | HOMA-IR              |
|--------------------------|---------------------|----------------------|----------------------|
| BMI                      | 0.30 (0.16, 0.44)   | 0.37 (0.27, 0.47)    | 0.36 (0.26, 0.47)    |
| Waist-hip ratio          | 0.29 (0.14, 0.43)   | 0.31 (0.21, 0.41)    | 0.30 (0.20, 0.41)    |
| Systolic blood pressure  | 0.28 (0.14, 0.43)   | 0.12 (0.01, 0.22)    | 0.12 (0.01, 0.22)    |
| Diastolic blood pressure | 0.17 (0.03, 0.32)   | 0.21 (0.10, 0.31)    | 0.20 (0.10, 0.31)    |
| Cholesterol              | 0.07 (-0.06, 0.21)  | 0.15 (0.05, 0.25)    | 0.15 (0.05, 0.25)    |
| Triglycerides            | 0.32 (0.18, 0.46)   | 0.31 (0.21, 0.41)    | 0.32 (0.21, 0.42)    |
| HDL cholesterol          | -0.13 (-0.27, 0.01) | -0.16 (-0.27, -0.06) | -0.17 (-0.27, -0.06) |
| Intima media thickness   | -0.02 (-0.17, 0.11) | -0.03 (-0.13, 0.07)  | -0.03 (-0.14, 0.07)  |
| Pulse wave velocity      | 0.17 (0.02, 0.33)   | 0.13 (0.02, 0.24)    | 0.14 (0.03, 0.25)    |

Values are  $\beta$  regression coefficients (95% CI). All dependent and independent variables in a linear regression model are Z standardized.
