# Supplementary material for: Higher glucose, insulin and insulin resistance (HOMA-IR) in childhood predict adverse cardiovascular risk in early adulthood: the Pune Children’s Study
Source: PubMed Central journal article supplement (PMC4472941; doi:10.1007/s00125-015-3602-z), 2015-05-05
Supplement: 125_2015_3602_MOESM3_ESM.pdf [file 125_2015_3602_MOESM3_ESM.pdf]

ESM Table 3: Comparison of 21-year CVD risk factors in those who were in lowest quartile of HOMA-IR at both 8 and 21 years and those who were in the highest quartile at both ages

|                          | In the lowest quartile of HOMA-<br>IR at both 8 and 21years<br>(n=28)<br>(15 boys, 13 girls) | In the highest quartile of HOMA-IR<br>at both 8 and 21years<br>(n=31)<br>(17 boys, 14 girls) | p-value | p-value<br>adjusted for<br>age, gender | p-value adjusted<br>for age, gender,<br>BMI, WHR |
|--------------------------|----------------------------------------------------------------------------------------------|----------------------------------------------------------------------------------------------|---------|----------------------------------------|--------------------------------------------------|
| BMI kg/m <sup>2</sup>    | 18.8 (3.0)                                                                                   | 24.5 (4.4)                                                                                   | <0.001  | <0.001                                 | ---                                              |
| Waist hip ratio          | 0.80 (0.05)                                                                                  | 0.86 (0.07)                                                                                  | 0.001   | <0.001                                 | ---                                              |
| Fasting glucose mmol/L   | 4.7 (0.3)                                                                                    | 5.4 (0.5)                                                                                    | <0.001  | <0.001                                 | 0.002                                            |
| 120 min glucose mmol/L † | 5.0 (4.2, 5.8)                                                                               | 6.0 (5.2, 7.8)                                                                               | 0.003   | 0.002                                  | 0.122                                            |
| Fasting insulin pmol/L † | 19.5 (14.6, 24.6)                                                                            | 77.7 (67.9, 100.7)                                                                           | <0.001  | <0.001                                 | <0.001                                           |
| 120 min insulin pmol/L † | 188.3 (106.9, 322.3)                                                                         | 488.5 (333.4, 1016.2)                                                                        | <0.001  | 0.002                                  | 0.002                                            |
| HOMA beta †              | 55.6 (48.9, 77.9)                                                                            | 117.6 (105.5, 151.0)                                                                         | <0.001  | <0.001                                 | <0.001                                           |
| Matsuda index †          | 11.1 (8.0, 16.3)                                                                             | 2.9 (2.0, 3.8)                                                                               | <0.001  | <0.001                                 | <0.001                                           |
| Insulinogenic index †    | 42.9 (30.4, 64.7)                                                                            | 70.8 (50.4, 101.8)                                                                           | 0.001   | 0.001                                  | 0.012                                            |
| Systolic BP mmHg         | 105.8 (11.9)                                                                                 | 113.5 (9.7)                                                                                  | 0.009   | 0.003                                  | 0.570                                            |
| Diastolic BP mmHg        | 62.4 (9.2)                                                                                   | 67.5 (6.6)                                                                                   | 0.018   | 0.016                                  | 0.689                                            |
| Cholesterol mmol/L       | 3.6 (0.5)                                                                                    | 4.1 (0.7)                                                                                    | 0.002   | 0.003                                  | 0.009                                            |
| Triglycerides mmol/L †   | 0.7 (0.5, 0.3)                                                                               | 1.2 (1.0, 1.5)                                                                               | <0.001  | 0.001                                  | 0.091                                            |

|                             |                       |                       |       |       |       |
|-----------------------------|-----------------------|-----------------------|-------|-------|-------|
| HDL cholesterol mmol/L      | 1.1 (0.2)             | 0.9 (0.1)             | 0.007 | 0.005 | 0.257 |
| Intima media thickness mm † | 0.36 (0.34, 0.40)     | 0.36 (0.34, 0.40)     | 0.856 | 0.900 | 0.703 |
| Pulse wave velocity cm/s †  | 926.0 (856.0, 1027.3) | 975.3 (878.0, 1039.7) | 0.600 | 0.211 | 0.676 |

---

Values are mean (SD) or † median (25<sup>th</sup> -75<sup>th</sup> percentiles). P value by t test or ANOVA or Mann-Whitney test as appropriate
