# Supplementary material for: Higher glucose, insulin and insulin resistance (HOMA-IR) in childhood predict adverse cardiovascular risk in early adulthood: the Pune Children’s Study
Source: Springer Nature journal article supplement (doi:10.1007/s00125-015-3602-z), 2015-05-04
Supplement: MOESM2 [file 8093004]

ESM Table 2: Comparison of 21-year CVD risk factors in those with and without acanthosis nigricans at 21y

|                          | Acanthosis nigricans present<br>(n=42)<br>(29 boys, 13 girls) | Acanthosis nigricans absent<br>(n=307)<br>(156 boys, 151 girls) | p-value | p-value<br>adjusted for<br>gender |
|--------------------------|---------------------------------------------------------------|-----------------------------------------------------------------|---------|-----------------------------------|
| BMI kg/m <sup>2</sup>    | 24.9 (4.5)                                                    | 21.1 (3.8)                                                      | <0.001  | <0.001                            |
| Waist hip ratio          | 0.86 (0.06)                                                   | 0.82 (0.06)                                                     | 0.001   | 0.005                             |
| Fasting glucose mmol/L   | 5.1 (0.3)                                                     | 5.0 (0.4)                                                       | 0.119   | 0.245                             |
| 120 min glucose mmol/L † | 5.7 (5.2, 7.0)                                                | 5.6 (4.8, 6.5)                                                  | 0.076   | 0.024                             |
| Fasting insulin pmol/L † | 51.7 (41.1, 87.6)                                             | 41.7 (26.6, 62.6)                                               | 0.006   | <0.001                            |
| 120 min insulin pmol/L † | 388.2 (241.0, 786.9)                                          | 286.0 (183.7, 458.8)                                            | 0.002   | 0.001                             |
| HOMA IR †                | 1.1 (0.9, 1.8)                                                | 0.9 (0.6, 1.4)                                                  | 0.005   | <0.001                            |
| HOMA beta †              | 95.8 (83.4, 134.4)                                            | 86.9 (63.6, 109.8)                                              | 0.013   | 0.001                             |
| Matsuda index            | 4.2 (2.6, 6.1)                                                | 5.9 (3.8, 8.9)                                                  | 0.001   | <0.001                            |
| Insulinogenic index †    | 56.2 (39.2, 76.5)                                             | 53.8 (38.7, 82.0)                                               | 0.869   | 0.572                             |
| Systolic BP mmHg         | 113.3 (11.0)                                                  | 108.8 (11.1)                                                    | 0.015   | 0.138                             |
| Diastolic BP mmHg        | 66.5 (7.9)                                                    | 64.2 (8.0)                                                      | 0.094   | 0.144                             |
| Cholesterol mmol/L       | 3.7 (0.7)                                                     | 3.8 (0.7)                                                       | 0.474   | 0.393                             |
| Triglycerides mmol/L †   | 0.9 (0.7, 1.2)                                                | 0.7 (0.6, 1.1)                                                  | 0.035   | 0.079                             |
| HDL cholesterol mmol/L   | 0.9 (0.1)                                                     | 1.0 (0.2)                                                       | <0.001  | 0.003                             |

|                             |                        |                       |       |       |
|-----------------------------|------------------------|-----------------------|-------|-------|
| Intima media thickness mm † | 0.37 (0.35, 0.39)      | 0.36 (0.33, 0.40)     | 0.376 | 0.793 |
| Pulse wave velocity cm/s †  | 1000.0 (920.0, 1073.3) | 953.0 (860.0, 1036.8) | 0.019 | 0.044 |

---

Values are mean (SD) or median (25<sup>th</sup> -75<sup>th</sup> percentiles) †. P value by t test or ANOVA or Mann-Whitney test as appropriate
